# Supplementary material
Source: publisher site journal article supplement (https://cdn.jamanetwork.com/ama/content_public/journal/jama-health-forum/939099/ald230003supp2_prod_1678915340.32759.pdf)
Supplement: Supplementary file [file ald230003supp2_prod_1678915340.32759.pdf]

## Data Sharing Statement

Khunte. Projected COVID-19 Mortality Reduction From Paxlovid Rollout. *JAMA Health Forum*. Published March 17, 2023. doi:10.1001/jamahealthforum.2023.0046

### Data

**Data available:** Yes

**Data types:** Data (not involving human participants)

**How to access data:** The data sources are listed in the Supplement. The corresponding author can be reached at [alyssa\\_bilinski@brown.edu](mailto:alyssa_bilinski@brown.edu).

**When available:** With publication

### Supporting Documents

**Document types:** Statistical/analytic code

**How to access documents:** [alyssa\\_bilinski@brown.edu](mailto:alyssa_bilinski@brown.edu)

**When available:** With publication

### Additional Information

**Who can access the data:** anyone requesting the data

**Types of analyses:** for any purpose

**Mechanisms of data availability:** with investigator support
